# Supplementary material for: Genetic hypervariability of a Northeastern Atlantic venomous rockfish
Source: PeerJ journal article supplement (doi:10.7717/peerj.11730), 2021-07-12

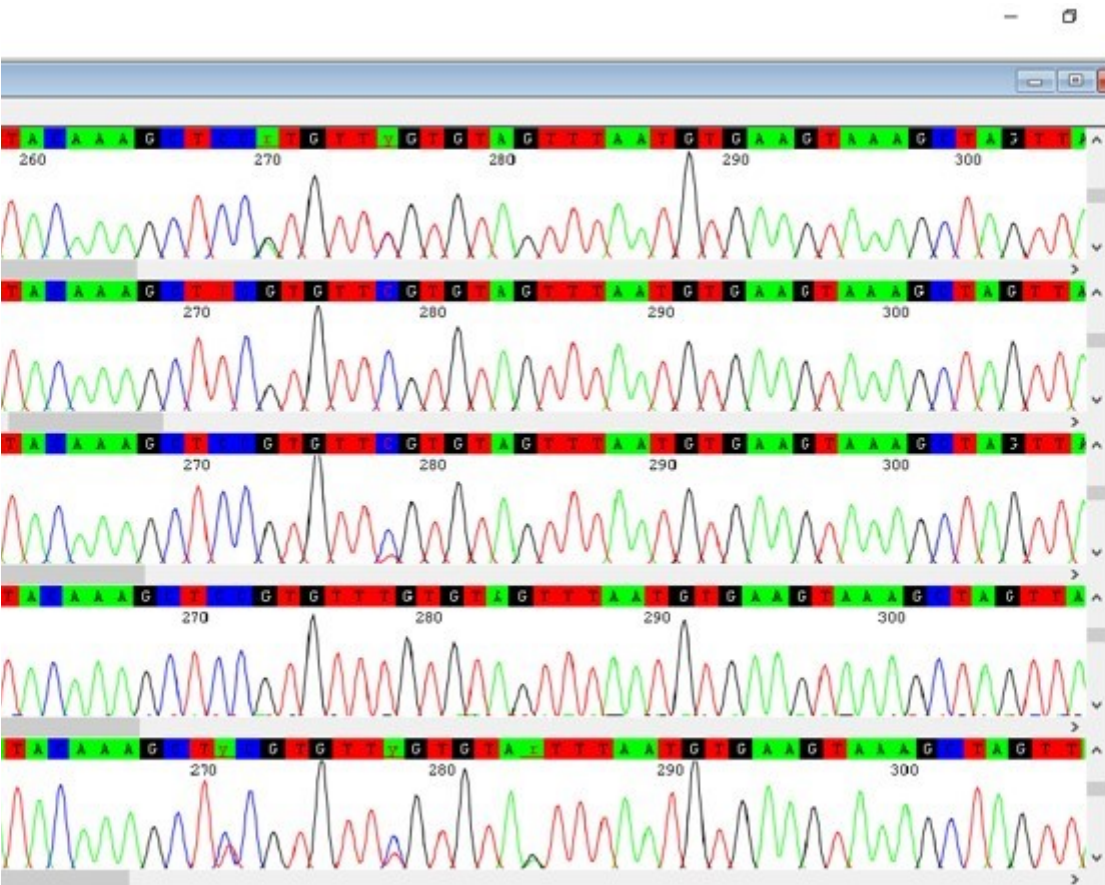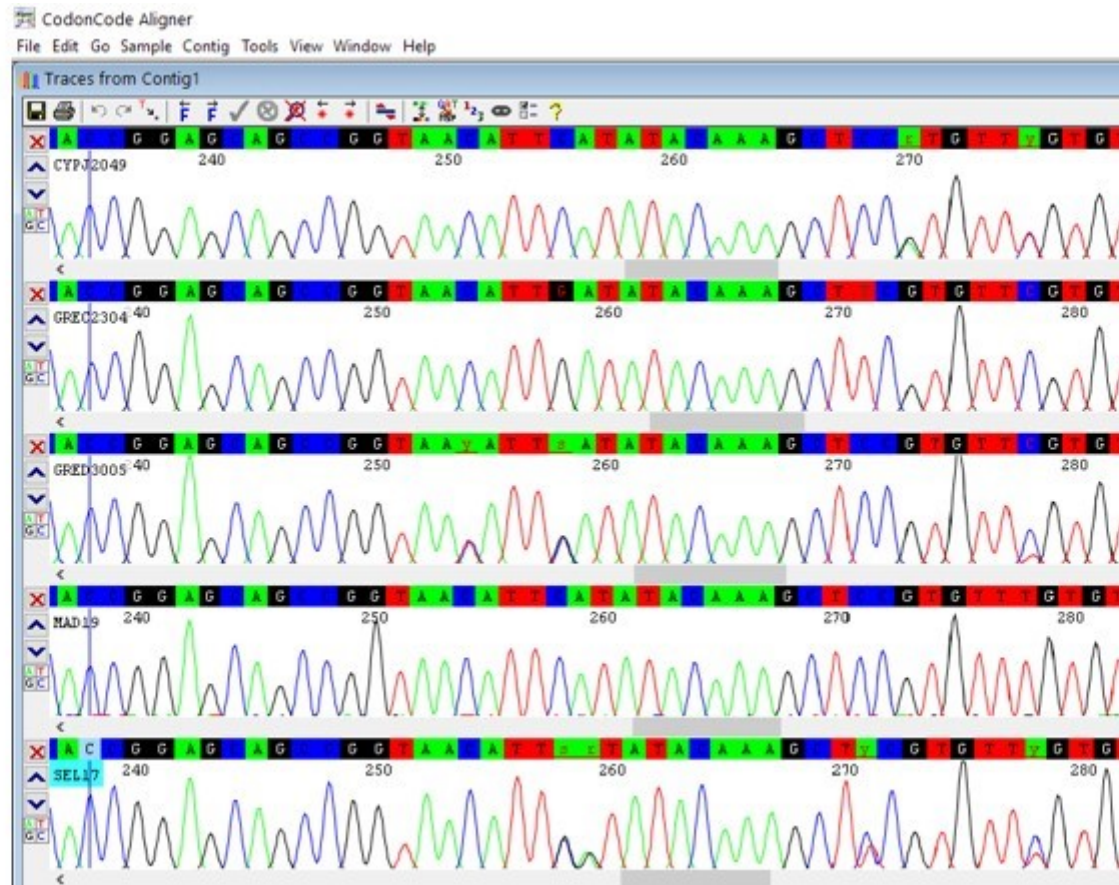

Supplement: Figure_S1_-_electrophoregrams_S7.pdf [file Figure_S1_-_electrophoregrams_S7.pdf]
